# Supplementary material for: Species Distribution Modeling Reveals Recent Shifts in Suitable Habitat for Six North American Cypripedium spp. (Orchidaceae)
Source: MDPI journal article supplement (doi:10.3390/d14090694), 2022-08-23
Supplement: s1 [file s1 › Figure S1.pdf]

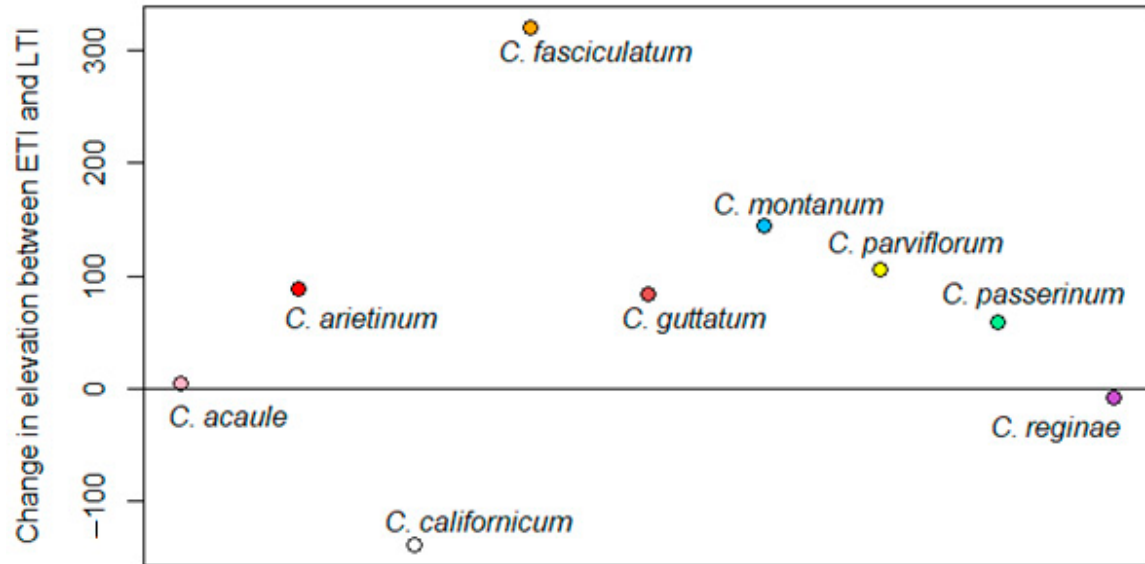

**Figure S1.** Change in mean elevation (m) of suitable habitat from the ETI to the LTI for nine North American species of *Cypripedium*: *C. acaule* (pink), *C. arietinum* (red), *C. californicum* (white), *C. fasciculatum* (orange), *C. guttatum* (dark red), *C. montanum* (blue), *C. parviflorum* (yellow), *C. passerinum* (green), and *C. reginae* (purple).
