# Supplementary material for: Species Distribution Modeling Reveals Recent Shifts in Suitable Habitat for Six North American Cypripedium spp. (Orchidaceae)
Source: MDPI journal article supplement (doi:10.3390/d14090694), 2022-08-23
Supplement: s1 [file s1 › Figure S2.pdf]

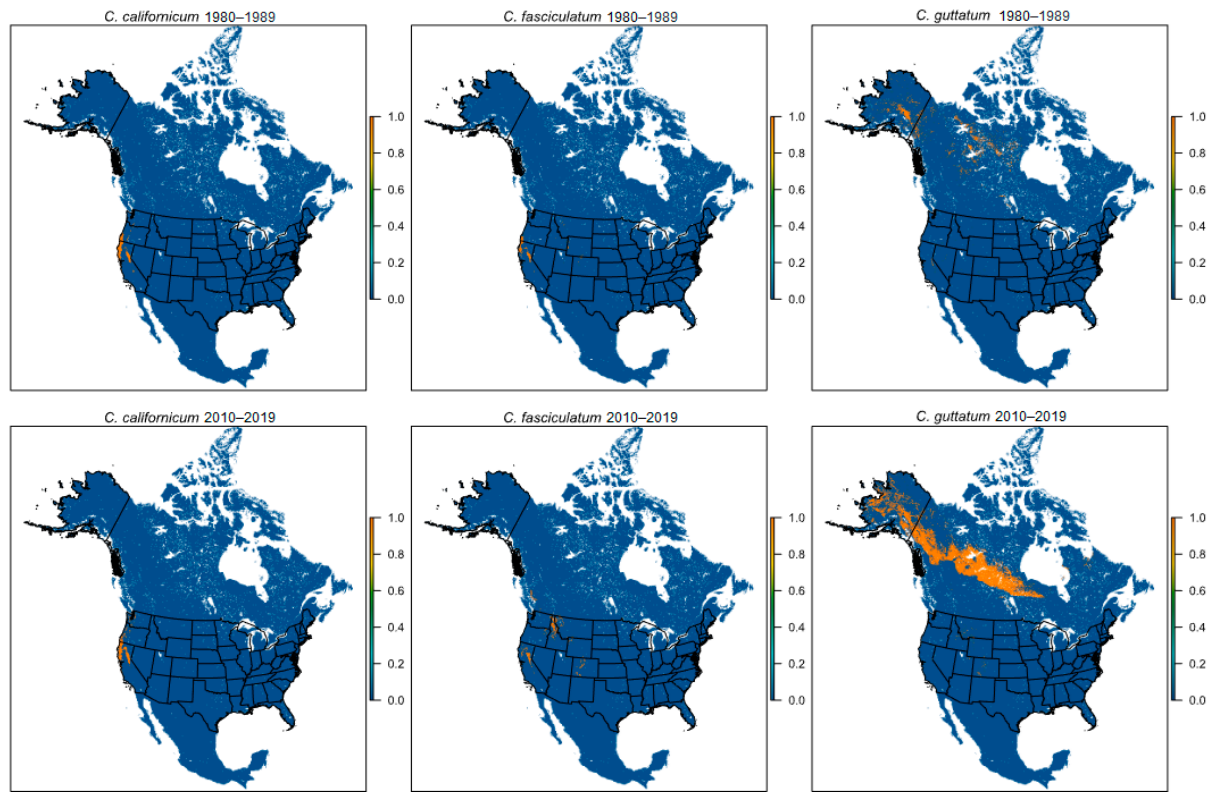

**Figure S2.** Maps showing MAXENT binary predictions of suitable habitat, based upon MSS threshold, for the three western species: *C. californicum*, *C. fasciculatum*, and *C. guttatum*. The top row illustrates the ETI prediction and the bottom row shows the LTI model. Colors illustrate suitability of habitat, with orange indicating suitable habitat and blue indicating the unsuitable habitat.
