# Supplementary material for: Species Distribution Modeling Reveals Recent Shifts in Suitable Habitat for Six North American Cypripedium spp. (Orchidaceae)
Source: MDPI journal article supplement (doi:10.3390/d14090694), 2022-08-23
Supplement: s1 [file s1 › Figure S3.pdf]

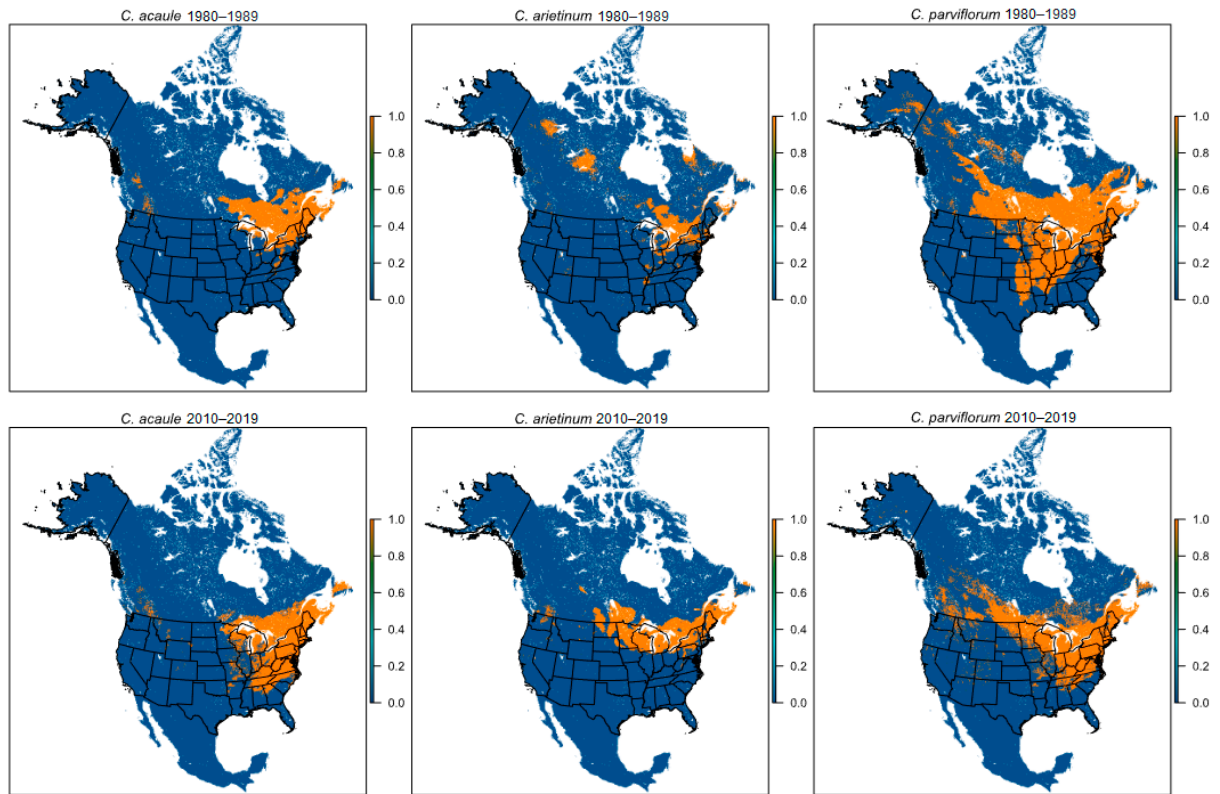

**Figure S3.** Maps showing MAXENT binary predictions of suitable habitat, based upon MSS threshold, for the three eastern species: *C. acaule*, *C. arietinum*, and *C. parviflorum*. The top row illustrates the ETI prediction and the bottom the LTI. Colors illustrate suitability of habitat, with orange indicating suitable habitat and blue indicating the unsuitable habitat.
