# Supplementary material for: Species Distribution Modeling Reveals Recent Shifts in Suitable Habitat for Six North American Cypripedium spp. (Orchidaceae)
Source: MDPI journal article supplement (doi:10.3390/d14090694), 2022-08-23
Supplement: s1 [file s1 › Figure S4.pdf]

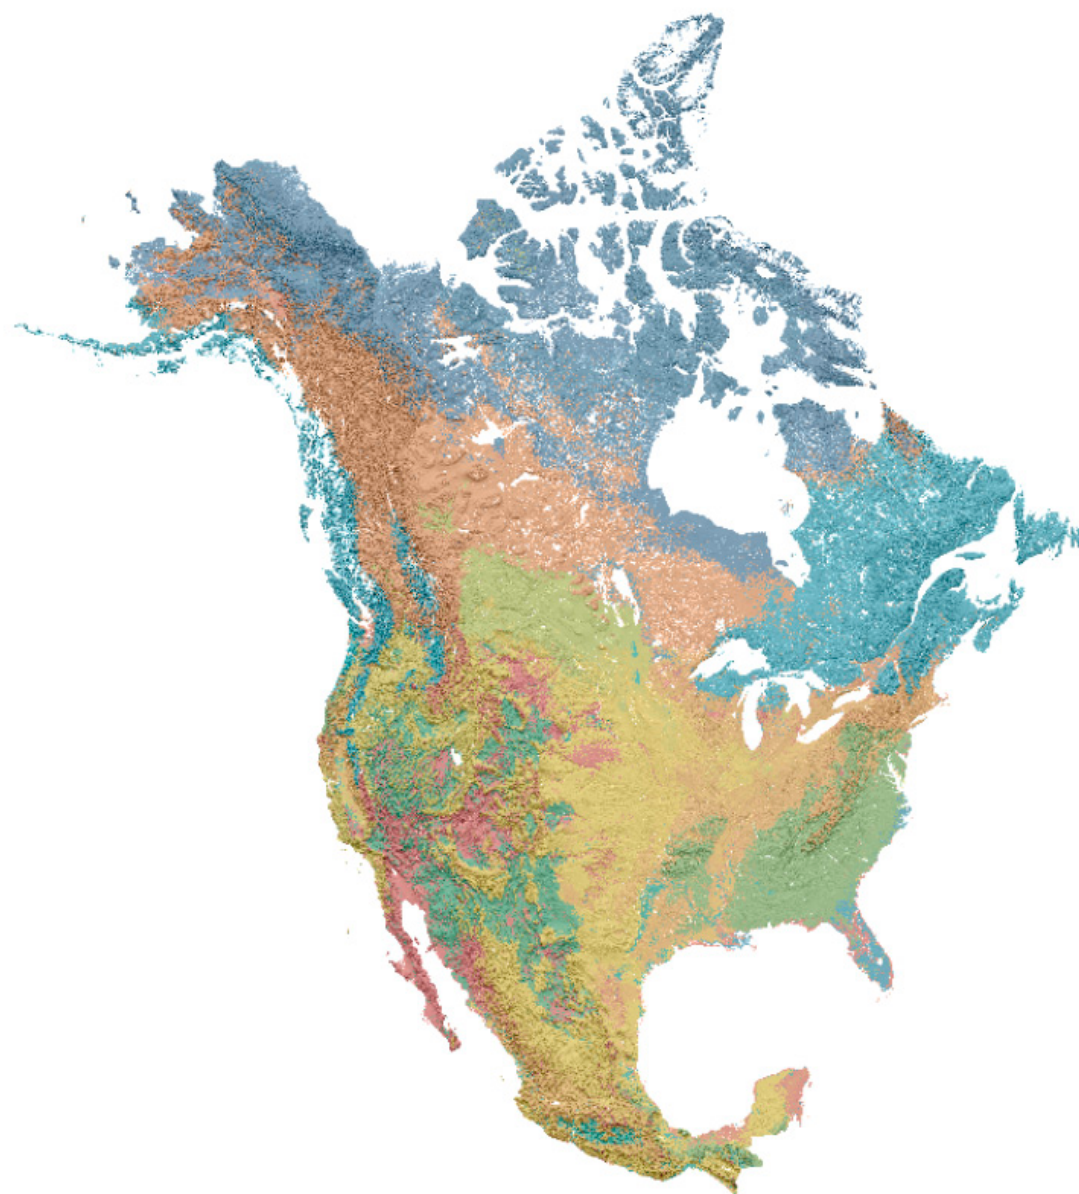

**Figure S4.** Distribution of USDA soil orders across North America, with colors representing different soil orders.
