# Supplementary material for: Species Distribution Modeling Reveals Recent Shifts in Suitable Habitat for Six North American Cypripedium spp. (Orchidaceae)
Source: MDPI journal article supplement (doi:10.3390/d14090694), 2022-08-23
Supplement: s1 [file s1 › Table S1.pdf]

**Table S1** Bioclimatic correlates of suitable habitat used for SDM construction.

| <b>Abbreviation</b> | <b>Bioclimatic Variable</b>                                                   |
|---------------------|-------------------------------------------------------------------------------|
| Bio1                | Annual Mean Temperature                                                       |
| Bio2                | Mean Diurnal Range                                                            |
| Bio3                | Isothermality                                                                 |
| Bio4                | Temperature Seasonality (Standard Deviation of Annual Mean Temperature X 100) |
| Bio5                | Max Temperature of Warmest Month                                              |
| Bio6                | Min Temperature of Coldest Month                                              |
| Bio7                | Temperature Annual Range                                                      |
| Bio8                | Mean Temperature of Wettest Quarter                                           |
| Bio9                | Mean Temperature Driest Quarter                                               |
| Bio10               | Mean Temperature of Warmest Quarter                                           |
| Bio11               | Mean Temperature of Coldest Quarter                                           |
| Bio12               | Annual Precipitation                                                          |
| Bio13               | Precipitation of Wettest Month                                                |
| Bio14               | Precipitation of Driest Month                                                 |
| Bio15               | Precipitation Seasonality (Coefficient of Variation)                          |
| Bio16               | Precipitation of Wettest Quarter                                              |
| Bio17               | Precipitation of Driest Quarter                                               |
| Bio18               | Precipitation of Warmest Quarter                                              |
| Bio19               | Precipitation of Coldest Quarter                                              |
