# Supplementary material for: Species Distribution Modeling Reveals Recent Shifts in Suitable Habitat for Six North American Cypripedium spp. (Orchidaceae)
Source: MDPI journal article supplement (doi:10.3390/d14090694), 2022-08-23
Supplement: s1 [file s1 › Table S2.pdf]

**Table S2** Summary of MAXENT models for nine North American species of *Cypripedium* for the ETI (1980-1989). Percent contribution of each environmental variable is reported, with variables that were retained shown in bold. Variables with a percent contribution of 0.0% were not used in the respective species model. The AUC of each model is also reported.

| Variable   | <i>C. acaule</i> | <i>C. arietinum</i> | <i>C. californicum</i> | <i>C. fasciculatum</i> | <i>C. guttatum</i> | <i>C. montanum</i> | <i>C. parviflorum</i> | <i>C. passerinum</i> | <i>C. reginae</i> | Mean          |
|------------|------------------|---------------------|------------------------|------------------------|--------------------|--------------------|-----------------------|----------------------|-------------------|---------------|
| Bio1       | 0.0%             | 0.0%                | 0.0%                   | 0.0%                   | <b>18.1%</b>       | 0.0%               | 0.0%                  | 0.0%                 | 0.0%              | <b>2.0%</b>   |
| Bio2       | 0.0%             | 0.0%                | 0.0%                   | 0.0%                   | 0.0%               | 0.0%               | 0.0%                  | 0.0%                 | 0.0%              | <b>0.0%</b>   |
| Bio3       | <b>8.3%</b>      | <b>13.3%</b>        | 0.0%                   | 0.0%                   | 0.0%               | 0.0%               | <b>51.2%</b>          | <b>3.2%</b>          | <b>3.5%</b>       | <b>8.8%</b>   |
| Bio4       | 0.0%             | 0.0%                | <b>24.6%</b>           | 0.0%                   | 0.0%               | 0.0%               | 0.0%                  | 0.0%                 | 0.0%              | <b>2.7%</b>   |
| Bio5       | <b>24.1%</b>     | 0.0%                | 0.0%                   | 0.0%                   | 0.0%               | 0.0%               | <b>30.1%</b>          | 0.0%                 | 0.0%              | <b>6.0%</b>   |
| Bio6       | 0.0%             | 0.0%                | 0.0%                   | 0.0%                   | 0.0%               | 0.0%               | 0.0%                  | 0.0%                 | 0.0%              | <b>0.0%</b>   |
| Bio7       | 0.0%             | 0.0%                | 0.0%                   | 0.0%                   | 0.0%               | 0.0%               | 0.0%                  | 0.0%                 | <b>1.4%</b>       | <b>0.2%</b>   |
| Bio8       | 0.0%             | 0.0%                | <b>0.4%</b>            | 0.0%                   | 0.0%               | <b>49.6%</b>       | 0.0%                  | 0.0%                 | 0.0%              | <b>5.6%</b>   |
| Bio9       | 0.0%             | 0.0%                | 0.0%                   | 0.0%                   | 0.0%               | <b>22.5%</b>       | 0.0%                  | 0.0%                 | 0.0%              | <b>2.5%</b>   |
| Bio10      | 0.0%             | <b>5.2%</b>         | 0.0%                   | 0.0%                   | 0.0%               | 0.0%               | 0.0%                  | <b>34.0%</b>         | <b>4.1%</b>       | <b>4.8%</b>   |
| Bio11      | 0.0%             | 0.0%                | 0.0%                   | 0.0%                   | 0.0%               | 0.0%               | 0.0%                  | 0.0%                 | 0.0%              | <b>0.0%</b>   |
| Bio12      | 0.0%             | 0.0%                | 0.0%                   | 0.0%                   | 0.0%               | 0.0%               | 0.0%                  | 0.0%                 | 0.0%              | <b>0.0%</b>   |
| Bio13      | 0.0%             | 0.0%                | <b>48.0%</b>           | 0.0%                   | 0.0%               | 0.0%               | 0.0%                  | 0.0%                 | 0.0%              | <b>5.3%</b>   |
| Bio14      | 0.0%             | 0.0%                | <b>26.9%</b>           | 0.0%                   | 0.0%               | 0.0%               | 0.0%                  | 0.0%                 | <b>0.2%</b>       | <b>3.0%</b>   |
| Bio15      | <b>64.4%</b>     | <b>35.5%</b>        | 0.0%                   | 0.0%                   | <b>2.2%</b>        | 0.0%               | <b>6.4%</b>           | 0.0%                 | <b>21.6%</b>      | <b>14.5%</b>  |
| Bio16      | 0.0%             | 0.0%                | 0.0%                   | 0.0%                   | 0.0%               | 0.0%               | 0.0%                  | 0.0%                 | 0.0%              | <b>0.0%</b>   |
| Bio17      | 0.0%             | 0.0%                | 0.0%                   | 0.0%                   | <b>20.8%</b>       | 0.0%               | 0.0%                  | 0.0%                 | 0.0%              | <b>2.3%</b>   |
| Bio18      | 0.0%             | <b>7.6%</b>         | 0.0%                   | <b>26.5%</b>           | 0.0%               | <b>3.9%</b>        | 0.0%                  | 0.0%                 | <b>0.3%</b>       | <b>4.3%</b>   |
| Bio19      | 0.0%             | 0.0%                | 0.0%                   | <b>54.0%</b>           | 0.0%               | 0.0%               | 0.0%                  | 0.0%                 | 0.0%              | <b>6.0%</b>   |
| Soil       | <b>3.3%</b>      | <b>26.1%</b>        | 0.0%                   | <b>19.5%</b>           | <b>51.2%</b>       | <b>14.7%</b>       | <b>12.2%</b>          | <b>28.5%</b>         | <b>16.4%</b>      | <b>19.1%</b>  |
| Land Cover | 0.0%             | <b>12.3%</b>        | 0.0%                   | 0.0%                   | <b>7.6%</b>        | <b>9.3%</b>        | 0.0%                  | <b>34.3%</b>         | <b>52.5%</b>      | <b>12.9%</b>  |
| AUC        | 0.9170           | 0.9450              | 0.9944                 | 0.9954                 | 0.9636             | 0.9440             | 0.7689                | 0.9179               | 0.8790            | <b>0.9250</b> |
