# Supplementary material for: Species Distribution Modeling Reveals Recent Shifts in Suitable Habitat for Six North American Cypripedium spp. (Orchidaceae)
Source: MDPI journal article supplement (doi:10.3390/d14090694), 2022-08-23
Supplement: s1 [file s1 › Table S3.pdf]

**Table S3** Summary of MAXENT models for nine North American species of *Cypripedium* for the LTI (2010-2019). Percent contribution of each environmental variable is reported, with retained variables bolded. Variables with a percent contribution of 0.0% were not used in the respective species model. The AUC of each model is also reported.

| Variable   | <i>C. acaule</i> | <i>C. arietinum</i> | <i>C. californicum</i> | <i>C. fasciculatum</i> | <i>C. guttatum</i> | <i>C. montanum</i> | <i>C. parviflorum</i> | <i>C. passerinum</i> | <i>C. reginae</i> | Mean          |
|------------|------------------|---------------------|------------------------|------------------------|--------------------|--------------------|-----------------------|----------------------|-------------------|---------------|
| Bio1       | 0.0%             | 0.0%                | <b>1.4%</b>            | 0.0%                   | <b>24.6%</b>       | <b>14.9%</b>       | 0.0%                  | 0.0%                 | 0.0%              | <b>4.5%</b>   |
| Bio2       | 0.0%             | 0.0%                | 0.0%                   | 0.0%                   | 0.0%               | 0.0%               | 0.0%                  | 0.0%                 | 0.0%              | <b>0.0%</b>   |
| Bio3       | <b>0.4%</b>      | <b>30.6%</b>        | 0.0%                   | <b>1.8%</b>            | 0.0%               | <b>8.3%</b>        | <b>26.0%</b>          | <b>15.3%</b>         | <b>18.8%</b>      | <b>11.2%</b>  |
| Bio4       | <b>1.3%</b>      | <b>8.9%</b>         | 0.0%                   | <b>9.3%</b>            | 0.0%               | <b>35.1%</b>       | <b>15.6%</b>          | 0.0%                 | <b>5.5%</b>       | <b>8.4%</b>   |
| Bio5       | <b>22.3%</b>     | 0.0%                | 0.0%                   | 0.0%                   | 0.0%               | 0.0%               | <b>39.9%</b>          | <b>52.8%</b>         | <b>39.9%</b>      | <b>17.2%</b>  |
| Bio6       | 0.0%             | 0.0%                | 0.0%                   | 0.0%                   | 0.0%               | 0.0%               | 0.0%                  | 0.0%                 | 0.0%              | <b>0.0%</b>   |
| Bio7       | 0.0%             | 0.0%                | 0.0%                   | 0.0%                   | <b>12.4%</b>       | 0.0%               | 0.0%                  | <b>5.4%</b>          | 0.0%              | <b>2.0%</b>   |
| Bio8       | 0.0%             | 0.0%                | 0.0%                   | <b>10.3%</b>           | 0.0%               | 0.0%               | 0.0%                  | 0.0%                 | 0.0%              | <b>1.1%</b>   |
| Bio9       | 0.0%             | 0.0%                | 0.0%                   | 0.0%                   | 0.0%               | 0.0%               | 0.0%                  | 0.0%                 | 0.0%              | <b>0.0%</b>   |
| Bio10      | 0.0%             | <b>60.4%</b>        | 0.0%                   | 0.0%                   | 0.0%               | 0.0%               | 0.0%                  | 0.0%                 | 0.0%              | <b>6.7%</b>   |
| Bio11      | 0.0%             | 0.0%                | 0.0%                   | 0.0%                   | 0.0%               | 0.0%               | 0.0%                  | 0.0%                 | 0.0%              | <b>0.0%</b>   |
| Bio12      | 0.0%             | 0.0%                | 0.0%                   | 0.0%                   | <b>2.8%</b>        | 0.0%               | 0.0%                  | 0.0%                 | 0.0%              | <b>0.3%</b>   |
| Bio13      | 0.0%             | 0.0%                | 0.0%                   | 0.0%                   | 0.0%               | 0.0%               | 0.0%                  | 0.0%                 | 0.0%              | <b>0.0%</b>   |
| Bio14      | <b>70.9%</b>     | 0.0%                | 0.0%                   | 0.0%                   | 0.0%               | 0.0%               | 0.0%                  | 0.0%                 | <b>26.0%</b>      | <b>10.8%</b>  |
| Bio15      | 0.0%             | 0.0%                | 0.0%                   | 0.0%                   | 0.0%               | <b>3.3%</b>        | 0.0%                  | <b>0.7%</b>          | <b>3.5%</b>       | <b>0.8%</b>   |
| Bio16      | 0.0%             | 0.0%                | 0.0%                   | 0.0%                   | 0.0%               | 0.0%               | 0.0%                  | 0.0%                 | 0.0%              | <b>0.0%</b>   |
| Bio17      | 0.0%             | 0.0%                | 0.0%                   | 0.0%                   | 0.0%               | 0.0%               | 0.0%                  | 0.0%                 | 0.0%              | <b>0.0%</b>   |
| Bio18      | 0.0%             | 0.0%                | 0.0%                   | <b>21.6%</b>           | 0.0%               | <b>12.1%</b>       | 0.0%                  | 0.0%                 | 0.0%              | <b>3.7%</b>   |
| Bio19      | 0.0%             | 0.0%                | <b>50.1%</b>           | <b>36.5%</b>           | 0.0%               | <b>20.7%</b>       | 0.0%                  | 0.0%                 | 0.0%              | <b>11.9%</b>  |
| Soil       | <b>2.1%</b>      | 0.0%                | <b>48.5%</b>           | <b>20.5%</b>           | <b>60.2%</b>       | <b>5.6%</b>        | <b>8.8%</b>           | <b>25.9%</b>         | <b>1.5%</b>       | <b>19.2%</b>  |
| Land Cover | <b>3.0%</b>      | 0.0%                | 0.0%                   | 0.0%                   | 0.0%               | 0.0%               | <b>9.7%</b>           | 0.0%                 | <b>4.9%</b>       | <b>2.0%</b>   |
| AUC        | 0.8747           | 0.9730              | 0.9958                 | 0.9889                 | 0.9332             | 0.9764             | 0.9110                | 0.9119               | 0.9600            | <b>0.9472</b> |
